# Supplementary material
Source: Springer Nature journal article supplement (https://www.springermedizin.de/resource/supplementary/13046_2011_456_MOESM6_ESM.pdf/9662272)

## CALO

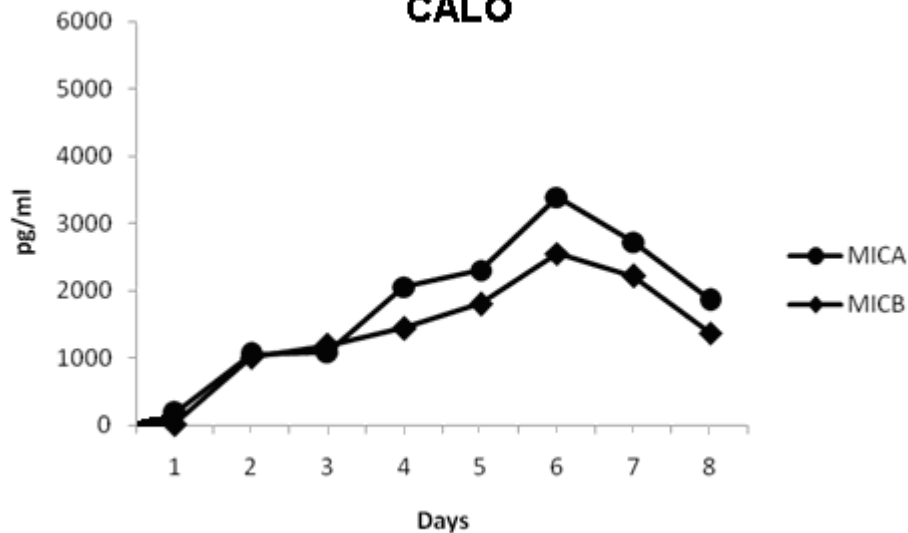

## INBL

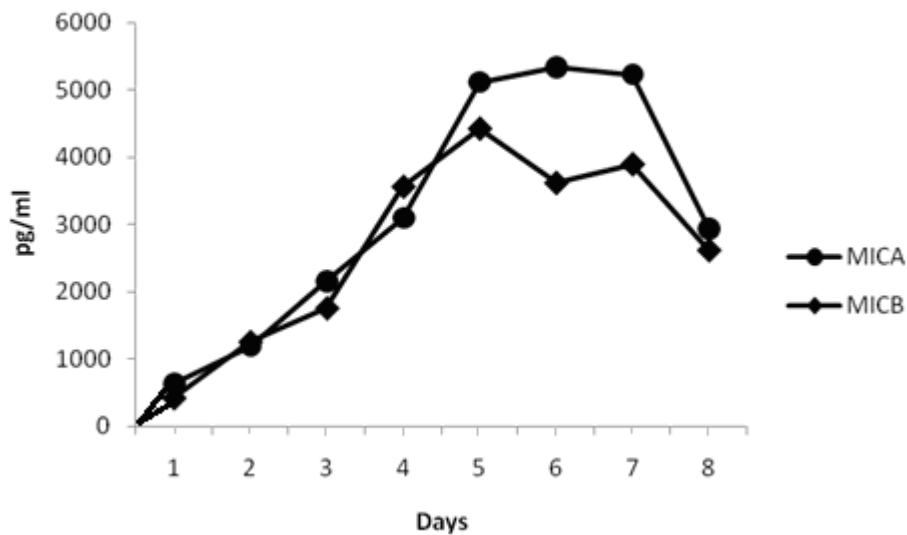

Supplement: MOESM6 [file 9662272]
